# Supplementary material for: Heavy Metals Nanofiltration Using Nanotube and Electric Field by Molecular Dynamics
Source: Hindawi journal article supplement (doi:10.1155/2020/4063201), 2020-05-11
Supplement: f1 [file 4063201.f1.docx]

# Supplemental Material

Table 1: Numerical values of the graphs CNT kinetic energy (Figure 2a).

| EF | Zn2+ | Cd2+ | Hg2+ | Pb2+ | Fe2+ |
| --- | --- | --- | --- | --- | --- |
| 10-8 | 1185.1526 | 1075.4156 | 1026.1546 | 1126.1891 | 1785.1269 |
| 10-7 | 1294.2311 | 1198.2314 | 1103.1523 | 1143.1569 | 1894.5412 |
| 10-6 | 1124.1568 | 1397.1561 | 1024.3241 | 1124.2324 | 1344.3241 |
| 10-5 | 1806.4564 | 1256.1257 | 1156.3214 | 1256.1523 | 1696.2415 |
| 10-4 | 1686.4854 | 1586.8413 | 1286.2169 | 1186.8412 | 1296.2165 |
| 10-3 | 2155.1564 | 1405.3548 | 1305.4561 | 1205.1584 | 2195.2354 |
| 10-2 | 1505.1561 | 1805.3165 | 1695.2157 | 1795.5196 | 1905.3546 |
| 10-1 | 2246.1548 | 2326.4532 | 1938.2315 | 1638.1513 | 2106.1452 |

Table 2: Numerical values of the BNNT kinetic energy (Figure 2b).

| EF | Zn2+ | Cd2+ | Hg2+ | Pb2+ | Fe2+ |
| --- | --- | --- | --- | --- | --- |
| 10-8 | 1085.4125 | 975.2541 | 926.1456 | 775.1842 | 1685.2345 |
| 10-7 | 1244.8456 | 1044.1855 | 1003.2198 | 1144.24875 | 1844.6589 |
| 10-6 | 1024.1564 | 1284.1815 | 1124.3541 | 1184.2695 | 1444.6594 |
| 10-5 | 1756.1526 | 1356.1561 | 1056.3215 | 1256.2354 | 1996.2485 |
| 10-4 | 1586.1561 | 1486.1648 | 1386.3265 | 1386.2874 | 1696.2341 |
| 10-3 | 2105.5616 | 1605.1987 | 1505.3241 | 1405.1586 | 2295.2354 |
| 10-2 | 2405.5615 | 1905.9874 | 1995.1248 | 1705.1998 | 2305.2484 |
| 10-1 | 2626.2231 | 2026.7894 | 2138.1278 | 1826.1845 | 2496.2495 |

Table 3: CNT temperature table referring to numerical values of the figure 3a.

| EF | Zn2+ | Cd2+ | Hg2+ | Pb2+ | Fe2+ |
| --- | --- | --- | --- | --- | --- |
| 10-8 | 274.2518 | 276.1269 | 274.1521 | 274.1261 | 279.1596 |

| 10-7 | 278.2685 | 286.2895 | 276.1511 | 277.1561 | 282.1574 |
| --- | --- | --- | --- | --- | --- |
| 10-6 | 280.2954 | 296.4852 | 280.6526 | 282.2378 | 286.1568 |
| 10-5 | 282.2387 | 305.1265 | 296.5613 | 294.1478 | 295.1541 |
| 10-4 | 295.2569 | 307.1561 | 298.1568 | 294.1247 | 303.1574 |
| 10-3 | 297.2459 | 310.1845 | 302.1236 | 309.1236 | 306.5698 |
| 10-2 | 303.1282 | 310.5415 | 307.1265 | 309.1258 | 310.3232 |
| 10-1 | 306.3254 | 310.8456 | 307.1245 | 309.1269 | 310.1569 |

Table 4: BNNT temperature numerical values of the Figure 3b.

| EF | Zn2+ | Cd2+ | Hg2+ | Pb2+ | Fe2+ |
| --- | --- | --- | --- | --- | --- |
| 10-8 | 274.1561 | 279.1891 | 276.5951 | 286.1512 | 272.8494 |
| 10-7 | 275.1568 | 282.1595 | 279.1591 | 289.1021 | 274.5461 |
| 10-6 | 280.8941 | 284.1532 | 282.1594 | 291.1269 | 276.5412 |
| 10-5 | 283.4894 | 286.1532 | 284.1548 | 298.1568 | 279.5456 |
| 10-4 | 293.1511 | 296.2548 | 292.8455 | 306.1548 | 281.5124 |
| 10-3 | 301.1595 | 305.1896 | 298.1521 | 309.1592 | 286.1284 |
| 10-2 | 303.1568 | 307.5748 | 302.1215 | 310.1254 | 291.1515 |
| 10-1 | 306.1561 | 307.8956 | 304.1595 | 310.1545 | 297.1564 |

Table 5: Expulsion values of the NTC of the Figure 5a.

| EF | Zn2+ | Cd2+ | Hg2+ | Pb2+ | Fe2+ |
| --- | --- | --- | --- | --- | --- |
| 10-8 | 82 | 96 | 94 | 90 | 80 |
| 10-7 | 75 | 72 | 75 | 77 | 79 |

| 10-6 | 69 | 65 | 70 | 68 | 65 |
| --- | --- | --- | --- | --- | --- |
| 10-5 | 58 | 64 | 69 | 52 | 45 |
| 10-4 | 49 | 53 | 50 | 35 | 35 |
| 10-3 | 45 | 36 | 40 | 31 | 33 |
| 10-2 | 44 | 34 | 33 | 29 | 30 |
| 10-1 | 34 | 30 | 29 | 25 | 29 |

Table 6: Expulsion values of the BNNT to the Figure 5b.

| EF | Zn2+ | Cd2+ | Hg2+ | Pb2+ | Fe2+ |
| --- | --- | --- | --- | --- | --- |
| 10-8 | 91 | 96 | 93 | 89 | 94 |
| 10-7 | 87 | 83 | 87 | 72 | 83 |
| 10-6 | 80 | 76 | 80 | 63 | 74 |
| 10-5 | 69 | 65 | 69 | 62 | 66 |
| 10-4 | 55 | 62 | 49 | 50 | 55 |
| 10-3 | 53 | 59 | 49 | 40 | 54 |
| 10-2 | 39 | 45 | 42 | 48 | 42 |
| 10-1 | 40 | 32 | 38 | 36 | 36 |

Table 7: Percentage of water molecules expelled without adding ions (Figure 4).

| EF | BNNT | CNT |
| --- | --- | --- |
| 10-8 | 33 | 37 |
| 10-7 | 32 | 26 |
| 10-6 | 36 | 22 |
| 10-5 | 35 | 20 |
| 10-4 | 35 | 19 |

| 10-3 | 29 | 15 |
| --- | --- | --- |
| 10-2 | 20 | 11 |
| 10-1 | 16 | 9 |
